# Supplementary material for: Extraction with Acidified Methanol—An Easy and Effective Method of Methyl Chlorogenate Formation, as Studied by ESI-MS
Source: MDPI journal article supplement (doi:10.3390/molecules27217543), 2022-11-03
Supplement: s1 [file s1]

Extraction with acidified methanol - an easy and effective method of methyl chlorogenate formation, as studied by ESI-MS – **supplementary material**

Karolina Szymborska<sup>1</sup>, Rafał Frański<sup>1,\*</sup>, Monika Beszterda-Buszcak<sup>2</sup>

<sup>1</sup> - Adam Mickiewicz University, Faculty of Chemistry, Uniwersytetu Poznańskiego 8, 61-614 Poznań, Poland

<sup>2</sup> - Poznań University of Life Sciences, Department of Food Biochemistry and Analysis, Mazowiecka 48, 60-623 Poznań, Poland.

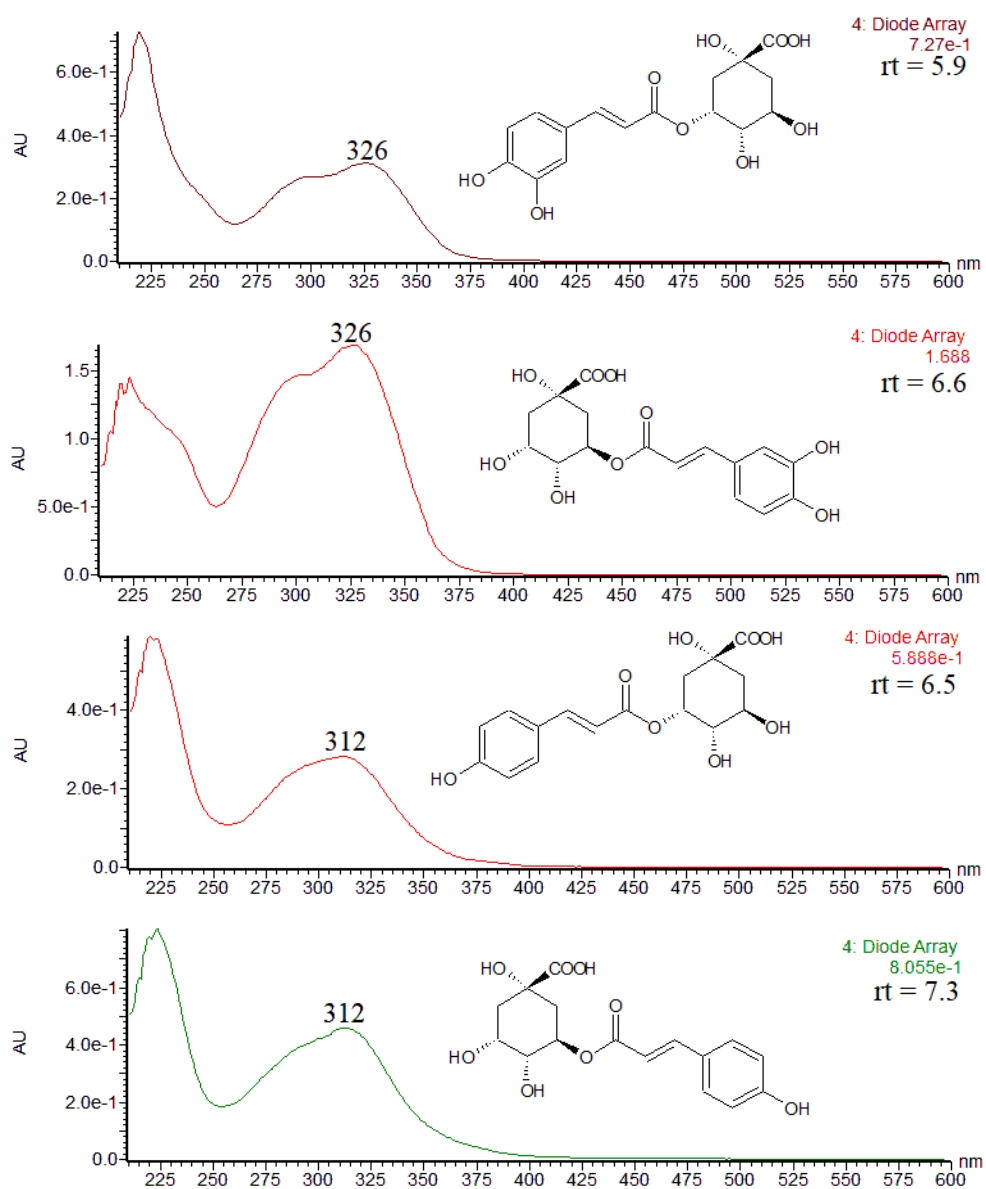

**Figure S1.** UV spectra, obtained during HPLC/UV analysis, of the main caffeoylquinic acids and coumaroylquinic acids detected.

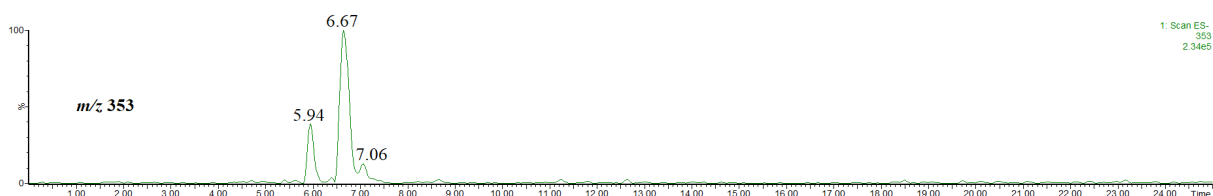

**Figure S2.** Single ion chromatogram of the ion at  $m/z$  353 obtained for the extract prepared by using acidified methanol.

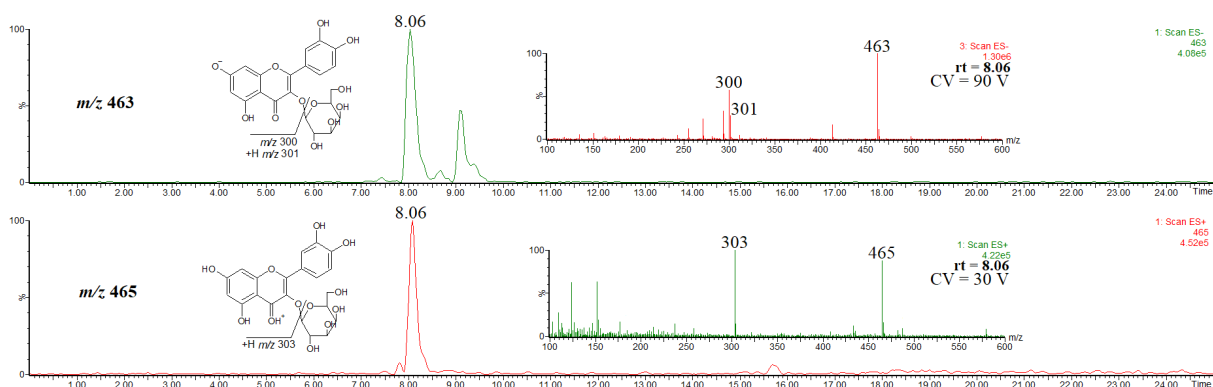

**Figure S3.** Identification of hyperoside in the methanolic extract of *Crataegus monogyna* ( $[M-H]^-$   $m/z$  463,  $[M+H]^+$   $m/z$  465).

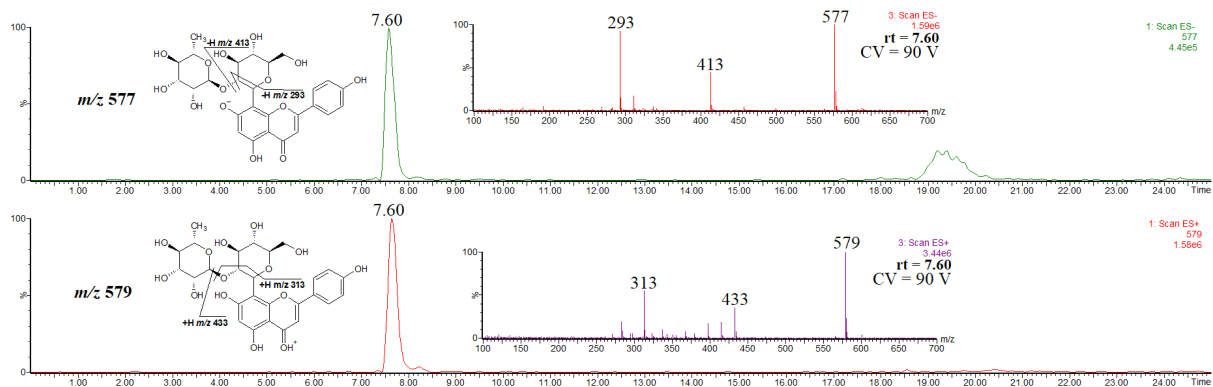

**Figure S4.** Identification of vitexin-2''-O-rhamnoside in the methanolic extract of *Crataegus monogyna* ( $[M-H]^-$   $m/z$  577,  $[M+H]^+$   $m/z$  579).

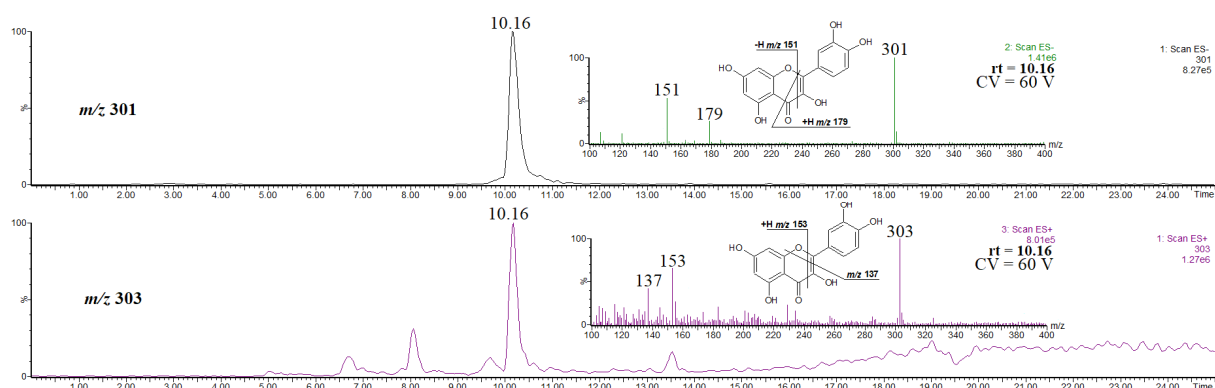

**Figure S5.** Identification of quercetin in the acidified methanolic extract of *Crataegus monogyna* ( $[M-H]^-$   $m/z$  301,  $[M+H]^+$   $m/z$  303).

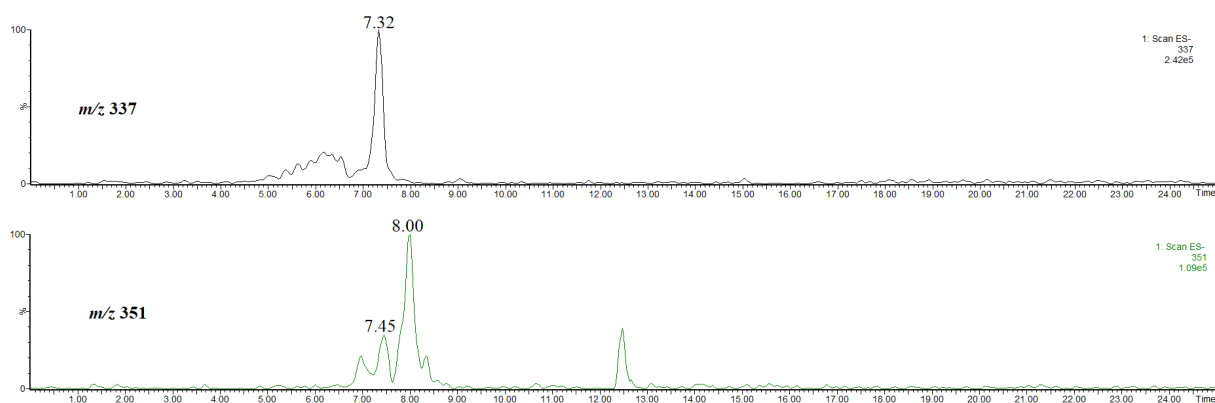

**Figure S6.** Single ion chromatogram of the ion at  $m/z$  337 (the  $[M-H]^-$  ion of coumaroylquinic acid) and  $m/z$  351 (the  $[M-H]^-$  ion of methyl coumaroylquinic acid) obtained for the extracts of kernels of *Prunus persica* var. *nucipersica* (nectarine).

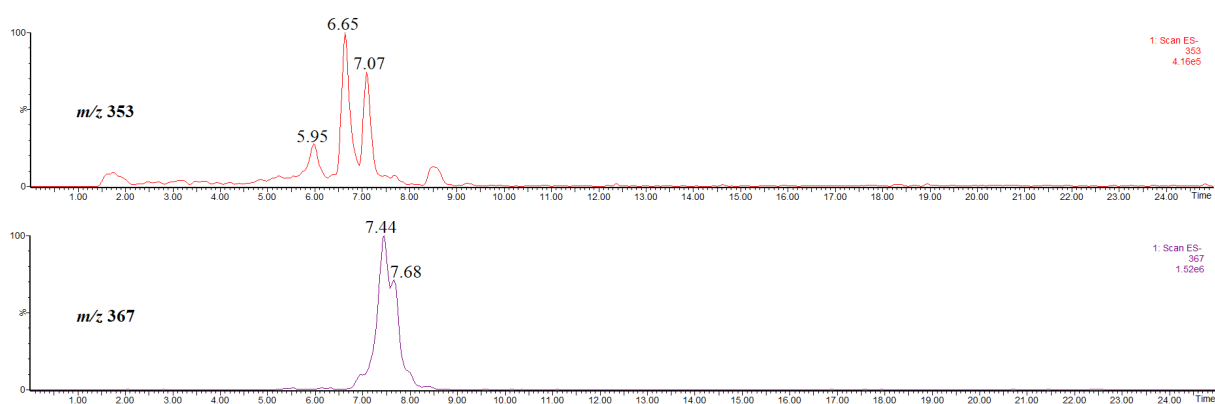

**Figure S7.** Single ion chromatogram of the ion at  $m/z$  353 (the  $[M-H]^-$  ion of chlorogenic acid) and  $m/z$  367 (the  $[M-H]^-$  ion of methyl chlorogenate) obtained for the extracts of kernels of *Prunus persica* var. *nucipersica* (nectarine).

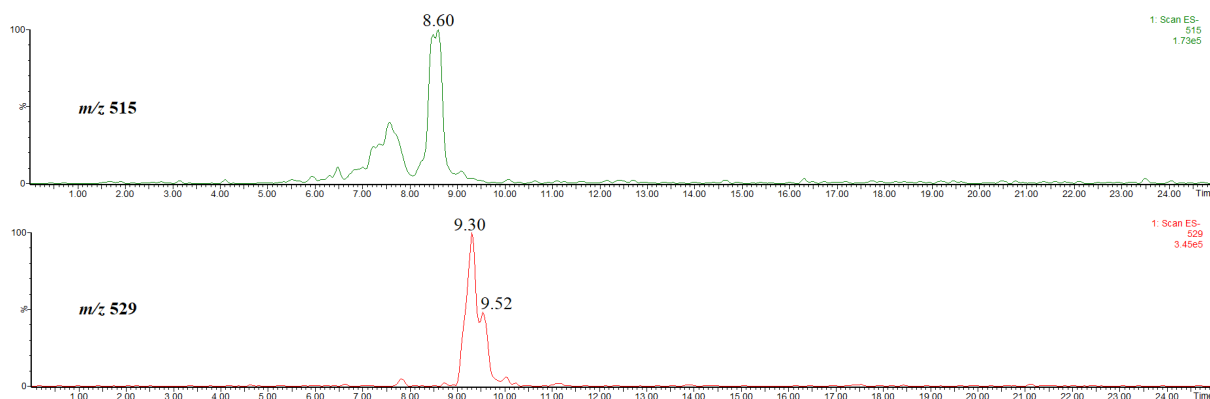

**Figure S8.** Single ion chromatogram of the ion at  $m/z$  515 (the  $[M-H]^-$  ion of 3,5-di-*O*-caffeoylquinic acid) and  $m/z$  529 (the  $[M-H]^-$  ion of methyl 3,5-di-*O*-caffeoylquinates) obtained for the extracts of kernels of *Prunus persica* var. *nucipersica* (nectarine).

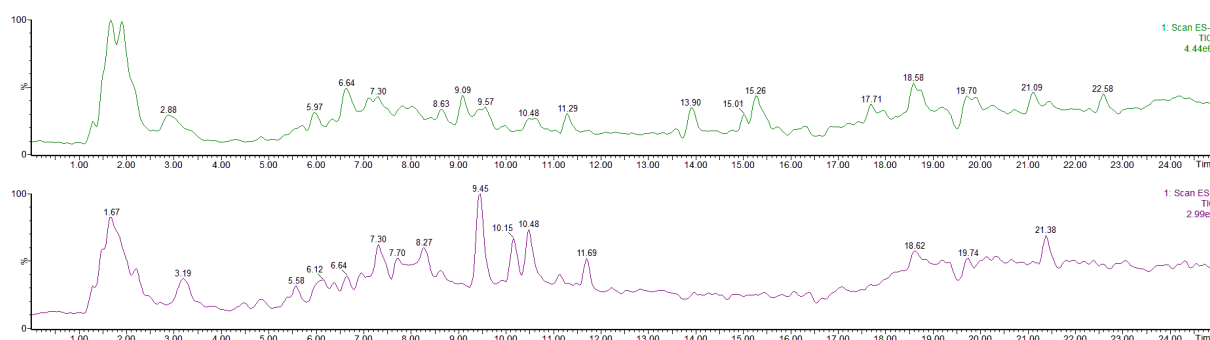

**Figure S9.** Total ion current chromatograms obtained for the extracts of *Crataegus monogyna* inflorescences by using methanol (top) and acidified methanol (bottom).

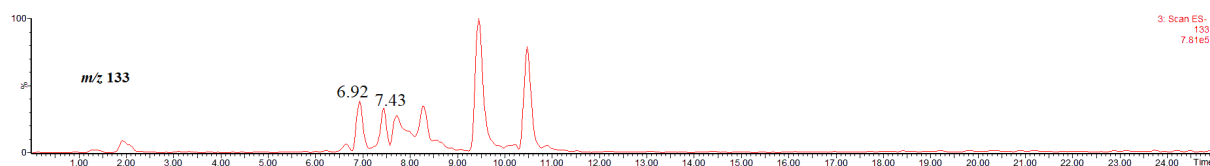

**Figure S10.** Single ion chromatogram of the ion at  $m/z$  133. The peaks at  $rt$  6.92 and 7.43 min clearly indicate that product ions at  $m/z$  133 originates from methyl 3-*O*-caffeoylquinic acid and methyl 4-*O*-caffeoylquinic acid – see Figure 4 in the manuscript.
